# Supplementary material
Source: PubMed Central journal article supplement (PMC7933101)

## Are Granulins Copper Sequestering Proteins?

Supplementary information

Fig S1

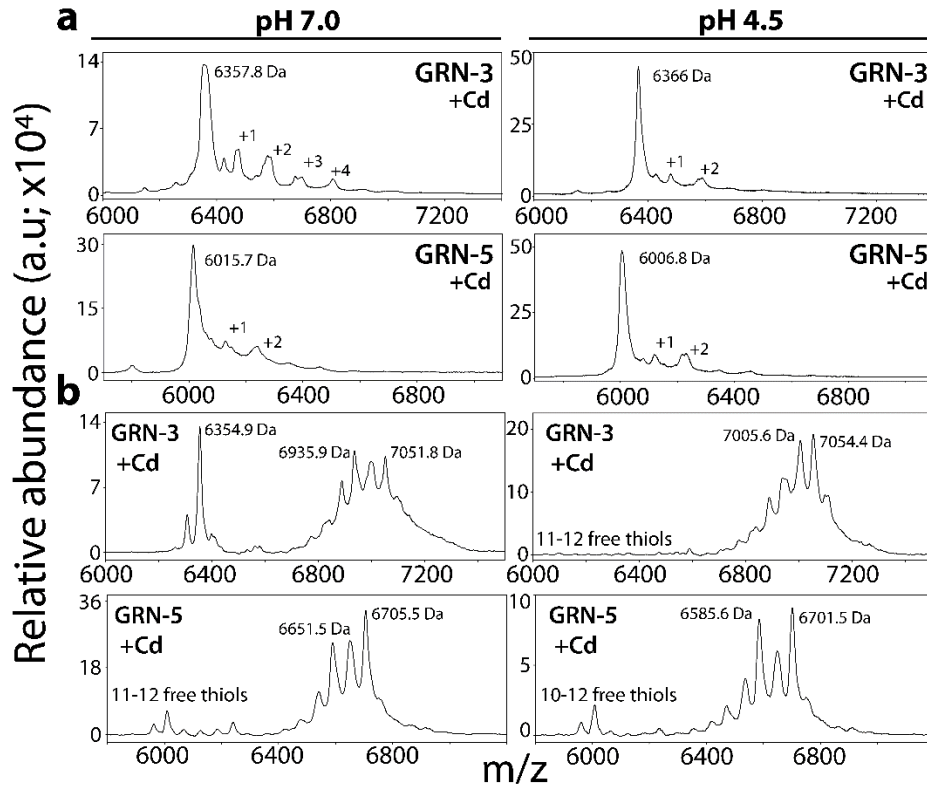

**Fig S1: Determination of Cd binding to GRNs and its effects on redox state of thiols.** a) MALDI-MS spectra of GRN-3,5 incubated separately with Cd at neutral or acidic pH. b) Alkylation reactions were carried out by incubating samples from a) with 1 mM IAA and analyzed using MALDI-MS.

**GRN-3 Ctrl -pH 7****Cu**

|       | Theoretical (Da) | Observed |                  | Theoretical (Da) |
|-------|------------------|----------|------------------|------------------|
| 0-apo | 6367.3           | 6367.8   | 0-apo            | 6367.3           |
|       |                  |          | 1 (plus 63.5 Da) | 6430.8           |
|       |                  |          | 2                | 6494.3           |
|       |                  |          | 3                | 6557.8           |
|       |                  |          | 4                | 6621.3           |
|       |                  |          | 5                | 6684.8           |
|       |                  |          | 6                | 6748.3           |
|       |                  |          | 7                | 6811.8           |
|       |                  |          | 8                | 6875.3           |
|       |                  |          | 9                | 6938.8           |
|       |                  |          | 10               | 7002.3           |
|       |                  |          | 11               | 7065.8           |
|       |                  |          | 12               | 7129.3           |

**GRN-5 Ctrl -pH 7****Cu**

|   | Theoretical (Da) | Observed |                  | Theoretical (Da) |
|---|------------------|----------|------------------|------------------|
| 0 | 6017.7           | 6017.8   | 0-apo            | 6017.7           |
|   |                  |          | 1 (plus 63.5 Da) | 6081.2           |
|   |                  |          | 2                | 6144.7           |
|   |                  |          | 3                | 6208.2           |
|   |                  |          | 4                | 6271.7           |
|   |                  |          | 5                | 6335.2           |
|   |                  |          | 6                | 6398.7           |
|   |                  |          | 7                | 6462.2           |
|   |                  |          | 8                | 6525.7           |
|   |                  |          | 9                | 6589.2           |
|   |                  |          | 10               | 6652.7           |
|   |                  |          | 11               | 6716.2           |
|   |                  |          | 12               | 6779.7           |

**Zn**

| Observed | Difference |     | Theoretical (Da)        |
|----------|------------|-----|-------------------------|
| 6357.8   |            | 9.5 | 0-apo 6367.3            |
| 6421.1   |            | 9.7 | 1 (plus 65.3 Da) 6432.6 |
| 6485.3   |            | 9   | 2 6497.9                |
| 6549     |            | 8.8 | 3 6563.2                |
| 6612.1   |            | 9.2 | 4 6628.5                |
| 6675.4   |            | 9.4 | 5 6693.8                |
| 6738.7   |            | 9.6 |                         |
| 6802     |            | 9.8 |                         |
| 6865.8   |            | 9.5 |                         |
| 6929.3   |            | 9.5 |                         |
| 6993.1   |            | 9.2 |                         |
| 7056.3   |            | 9.5 |                         |
| 7119.9   |            | 9.4 |                         |

| Observed | Difference |      |
|----------|------------|------|
| 6001.4   |            | 16.3 |
| 6064.3   |            | 16.9 |
| 6130.5   |            | 14.2 |
| 6208.8   |            | -0.6 |
| 6256.4   |            | 15.3 |
| 6320.5   |            | 14.7 |
| 6384.1   |            | 14.6 |
| 6447.6   |            | 14.6 |
| 6511.1   |            | 14.6 |
| 6574.5   |            | 14.7 |
| 6638.7   |            | 14   |
| 6702.2   |            | 14   |
| 6766.1   |            | 13.6 |

**Cd**

| Observed | Difference |                      | Theoretical (Da) |
|----------|------------|----------------------|------------------|
| 6370.9   |            | -3.6 0-apo           | 6367.3           |
| 6435.6   |            | -3 1 (plus 112.4 Da) | 6479.7           |
| 6501     |            | -3.1                 | 2 6592.1         |
| 6566.3   |            | -3.1                 | 3 6704.5         |
| 6626.8   |            | 1.7                  | 4 6816.9         |
| 6686.1   |            | 7.7                  |                  |

**Cd**

|                   | Theoretical (Da) |
|-------------------|------------------|
| 0-apo             | 6017.7           |
| 1 (plus 112.4 Da) | 6130.1           |
| 2                 | 6242.5           |
| 3                 | 6354.9           |

| Observed | Difference |
|----------|------------|
| 6357.8   | 9.5        |
| 6474.1   | 5.6        |
| 6577.9   | 14.2       |
| 6691.3   | 13.2       |
| 6803.5   | 13.4       |

| Observed | Difference |
|----------|------------|
| 6015.7   | 2          |
| 6128.5   | 1.6        |
| 6236.5   | 6          |
| 6347.5   | 7.4        |

**GRN-3 Ctrl -pH 4.5****Cu**

|       | Theoretical (Da) | Observed |                  | Theoretical (Da) | Observed |
|-------|------------------|----------|------------------|------------------|----------|
| 0-apo | 6367.3           | 6365.2   | 0-apo            | 6367.3           | 6352.7   |
|       |                  |          | 1 (plus 63.5 Da) | 6430.8           | 6417.2   |
|       |                  |          | 2                | 6494.3           | 6480.2   |
|       |                  |          | 3                | 6557.8           | 6560.6   |
|       |                  |          | 4                | 6621.3           | 6608.8   |
|       |                  |          | 5                | 6684.8           | 6670.7   |
|       |                  |          | 6                | 6748.3           | 6733.3   |
|       |                  |          | 7                | 6811.8           | 6799.3   |
|       |                  |          | 8                | 6875.3           |          |
|       |                  |          | 9                | 6938.8           |          |
|       |                  |          | 10               | 7002.3           |          |
|       |                  |          | 11               | 7065.8           |          |
|       |                  |          | 12               | 7129.3           |          |

**GRN-5 Ctrl -pH 4.5****Cu**

|   | Theoretical (Da) | Observed |                  | Theoretical (Da) | Observed |
|---|------------------|----------|------------------|------------------|----------|
| 0 | 6017.7           | 6016.2   | 0-apo            | 6017.7           | 6004.8   |
|   |                  |          | 1 (plus 63.5 Da) | 6081.2           | 6069.1   |
|   |                  |          | 2                | 6144.7           |          |
|   |                  |          | 3                | 6208.2           |          |
|   |                  |          | 4                | 6271.7           |          |
|   |                  |          | 5                | 6335.2           |          |
|   |                  |          | 6                | 6398.7           |          |
|   |                  |          | 7                | 6462.2           |          |
|   |                  |          | 8                | 6525.7           |          |
|   |                  |          | 9                | 6589.2           |          |
|   |                  |          | 10               | 6652.7           |          |
|   |                  |          | 11               | 6716.2           |          |
|   |                  |          | 12               | 6779.7           |          |

**Cd**

| Difference |                   | Theoretical (Da) | Observed | Difference |
|------------|-------------------|------------------|----------|------------|
| 14.6       | 0-apo             | 6367.3           | 6366     | 1.3        |
| 13.6       | 1 (plus 112.4 Da) | 6479.7           | 6478.7   | 1          |
| 14.1       |                   | 6592.1           | 6588.3   | 3.8        |
| -2.8       |                   |                  |          |            |
| 12.5       |                   |                  |          |            |
| 14.1       |                   |                  |          |            |
| 15         |                   |                  |          |            |
| 12.5       |                   |                  |          |            |

**Cd**

| Difference |                   | Theoretical (Da) | Observed | Difference |
|------------|-------------------|------------------|----------|------------|
| 12.9       | 0-apo             | 6017.7           | 6006.8   | 10.9       |
| 12.1       | 1 (plus 112.4 Da) | 6130.1           | 6120.7   | 9.4        |
|            |                   | 6242.5           | 6230.7   | 11.8       |

**GRN-3 IAS pH 7****Ctrl**

Theoretical Observed

|                           |        |        |
|---------------------------|--------|--------|
| No free thiols            | 6367.3 |        |
| 1 free thiol (plus 58 Da) | 6425.3 |        |
| 2 free thiol              | 6483.3 |        |
| 3 free thiol              | 6541.3 |        |
| 4 free thiol              | 6599.3 |        |
| 5 free thiol              | 6657.3 |        |
| 6 free thiol              | 6715.3 |        |
| 7 free thiol              | 6773.3 |        |
| 8 free thiol              | 6831.3 | 6843.8 |
| 9 free thiol              | 6889.3 | 6891.9 |
| 10 free thiol             | 6947.3 | 6957.9 |
| 11 free thiol             | 7005.3 | 7007.9 |
| 12 free thiol             | 7063.3 | 7055.7 |
|                           |        | 7009.1 |

**Ca**

Theoretical

|                           |        |
|---------------------------|--------|
| No free thiols            | 6367.3 |
| 1 free thiol (plus 58 Da) | 6425.3 |
| 2 free thiol              | 6483.3 |
| 3 free thiol              | 6541.3 |
| 4 free thiol              | 6599.3 |
| 5 free thiol              | 6657.3 |
| 6 free thiol              | 6715.3 |
| 7 free thiol              | 6773.3 |
| -12.5 8 free thiol        | 6831.3 |
| -2.6 9 free thiol         | 6889.3 |
| -10.6 10 free thiol       | 6947.3 |
| -2.6 11 free thiol        | 7005.3 |
| 7.6 12 free thiol         | 7063.3 |

**GRN-5 IAS pH 7****Ctrl**

Theoretical Observed Difference

|                           |        |        |        |
|---------------------------|--------|--------|--------|
| No free thiols            | 6017.7 | 6014.6 | 5968.1 |
| 1 free thiol (plus 58 Da) | 6075.7 | 6070.3 |        |
| 2 free thiol              | 6133.7 | 6131.5 |        |
| 3 free thiol              | 6191.7 | 6194.5 |        |
| 4 free thiol              | 6249.7 | 6248   |        |
| 5 free thiol              | 6307.7 | 6315   |        |
| 6 free thiol              | 6365.7 | 6370.4 |        |
| 7 free thiol              | 6423.7 | 6428.6 |        |
| 8 free thiol              | 6481.7 | 6482.3 |        |
| 9 free thiol              | 6539.7 | 6540.9 |        |
| 10 free thiol             | 6597.7 | 6592.9 |        |
| 11 free thiol             | 6655.7 | 6646.7 |        |
| 12 free thiol             | 6713.7 | 6704.6 |        |

**Ca**

Theoretical

|                               |        |
|-------------------------------|--------|
| No free thiols                | 6017.7 |
| 5.4 1 free thiol (plus 58 Da) | 6075.7 |
| 2.2 2 free thiol              | 6133.7 |
| -2.8 3 free thiol             | 6191.7 |
| 1.7 4 free thiol              | 6249.7 |
| -7.3 5 free thiol             | 6307.7 |
| -4.7 6 free thiol             | 6365.7 |
| -4.9 7 free thiol             | 6423.7 |
| -0.6 8 free thiol             | 6481.7 |
| -1.2 9 free thiol             | 6539.7 |
| 4.8 10 free thiol             | 6597.7 |
| 9 11 free thiol               | 6655.7 |
| 9.1 12 free thiol             | 6713.7 |



| Observed | Difference | Co                        | Theoretical | Observed | Difference | Cu                        |
|----------|------------|---------------------------|-------------|----------|------------|---------------------------|
|          |            | No free thiols            | 6367.3      |          |            | No free thiols            |
|          |            | 1 free thiol (plus 58 Da) | 6425.3      |          |            | 1 free thiol (plus 58 Da) |
|          |            | 2 free thiol              | 6483.3      |          |            | 2 free thiol              |
|          |            | 3 free thiol              | 6541.3      |          |            | 3 free thiol              |
|          |            | 4 free thiol              | 6599.3      |          |            | 4 free thiol              |
|          |            | 5 free thiol              | 6657.3      |          |            | 5 free thiol              |
|          |            | 6 free thiol              | 6715.3      |          |            | 6 free thiol              |
|          |            | 7 free thiol              | 6773.3      | 6785     | -11.7      | 7 free thiol              |
| 6842.5   | -11.2      | 8 free thiol              | 6831.3      | 6846.7   | -15.4      | 8 free thiol              |
| 6890.6   | -1.3       | 9 free thiol              | 6889.3      | 6898.4   | -9.1       | 9 free thiol              |
| 6956.6   | -9.3       | 10 free thiol             | 6947.3      | 6946.9   | 0.4        | 10 free thiol             |
| 7006.9   | -1.6       | 11 free thiol             | 7005.3      | 7014.9   | -9.6       | 11 free thiol             |
| 7055.5   | 7.8        | 12 free thiol             | 7063.3      | 7064.5   | -1.2       | 12 free thiol             |
| 7110.9   |            |                           |             | 7112.9   |            |                           |

| Observed | Difference | Co                        | Theoretical | Observed | Difference | Cu                        |
|----------|------------|---------------------------|-------------|----------|------------|---------------------------|
| 5962.5   |            |                           |             | 5961.6   |            |                           |
| 6009.5   | 8.2        | No free thiols            | 6017.7      | 6008.4   | 9.3        | No free thiols            |
| 6066     | 9.7        | 1 free thiol (plus 58 Da) | 6075.7      | 6064.4   | 11.3       | 1 free thiol (plus 58 Da) |
| 6125.8   | 7.9        | 2 free thiol              | 6133.7      | 6123.3   | 10.4       | 2 free thiol              |
| 6183.9   | 7.8        | 3 free thiol              | 6191.7      | 6189.7   | 2          | 3 free thiol              |
| 6243.5   | 6.2        | 4 free thiol              | 6249.7      | 6243.7   | 6          | 4 free thiol              |
| 6311.3   | -3.6       | 5 free thiol              | 6307.7      | 6307.2   | 0.5        | 5 free thiol              |
| 6370.2   | -4.5       | 6 free thiol              | 6365.7      | 6366.1   | -0.4       | 6 free thiol              |
| 6428.4   | -4.7       | 7 free thiol              | 6423.7      | 6423.3   | 0.4        | 7 free thiol              |
| 6477.1   | 4.6        | 8 free thiol              | 6481.7      | 6471.1   | 10.6       | 8 free thiol              |
| 6534.3   | 5.4        | 9 free thiol              | 6539.7      | 6541.2   | -1.5       | 9 free thiol              |
| 6591.85  | 5.85       | 10 free thiol             | 6597.7      | 6589.2   | 8.5        | 10 free thiol             |
| 6647.2   | 8.5        | 11 free thiol             | 6655.7      | 6646.8   | 8.9        | 11 free thiol             |
| 6704.3   | 9.4        | 12 free thiol             | 6713.7      | 6706     | 7.7        | 12 free thiol             |
|          |            |                           |             | 7112.9   |            |                           |

| Theoretical | Observed | Difference | Mg                        | Theoretical | Observed | Difference |
|-------------|----------|------------|---------------------------|-------------|----------|------------|
| 6367.3      | 6380.7   | -13.4      | No free thiols            | 6367.3      |          |            |
| 6425.3      | 6428.4   | -3.1       | 1 free thiol (plus 58 Da) | 6425.3      |          |            |
| 6483.3      | 6490.8   | -7.5       | 2 free thiol              | 6483.3      |          |            |
| 6541.3      | 6543.7   | -2.4       | 3 free thiol              | 6541.3      |          |            |
| 6599.3      | 6589.4   | 9.9        | 4 free thiol              | 6599.3      |          |            |
| 6657.3      |          |            | 5 free thiol              | 6657.3      |          |            |
| 6715.3      |          |            | 6 free thiol              | 6715.3      |          |            |
| 6773.3      |          |            | 7 free thiol              | 6773.3      |          |            |
| 6831.3      |          |            | 8 free thiol              | 6831.3      | 6843.3   | -12        |
| 6889.3      |          |            | 9 free thiol              | 6889.3      | 6891.4   | -2.1       |
| 6947.3      |          |            | 10 free thiol             | 6947.3      | 6956.9   | -9.6       |
| 7005.3      |          |            | 11 free thiol             | 7005.3      | 7005.8   | -0.5       |
| 7063.3      |          |            | 12 free thiol             | 7063.3      | 7054.3   | 9          |
|             |          |            |                           |             | 7113.39  |            |

| Theoretical | Observed | Difference | Mg                        | Theoretical | Observed | Difference |
|-------------|----------|------------|---------------------------|-------------|----------|------------|
|             | 5961.4   |            |                           |             | 5959.8   |            |
| 6017.7      | 6009     | 8.7        | No free thiols            | 6017.7      | 6007.1   | 10.6       |
| 6075.7      | 6058.8   | 16.9       | 1 free thiol (plus 58 Da) | 6075.7      | 6065.7   | 10         |
| 6133.7      | 6125.9   | 7.8        | 2 free thiol              | 6133.7      | 6124.3   | 9.4        |
| 6191.7      |          |            | 3 free thiol              | 6191.7      | 6187.2   | 4.5        |
| 6249.7      |          |            | 4 free thiol              | 6249.7      | 6238.7   | 11         |
| 6307.7      |          |            | 5 free thiol              | 6307.7      | 6307.9   | -0.2       |
| 6365.7      |          |            | 6 free thiol              | 6365.7      | 6366.6   | -0.9       |
| 6423.7      |          |            | 7 free thiol              | 6423.7      | 6426.2   | -2.5       |
| 6481.7      |          |            | 8 free thiol              | 6481.7      | 6484.4   | -2.7       |
| 6539.7      |          |            | 9 free thiol              | 6539.7      | 6542.3   | -2.6       |
| 6597.7      |          |            | 10 free thiol             | 6597.7      | 6589.2   | 8.5        |
| 6655.7      |          |            | 11 free thiol             | 6655.7      | 6648.9   | 6.8        |
| 6713.7      |          |            | 12 free thiol             | 6713.7      | 6707.4   | 6.3        |

| Mn                        |             |          |            | Ni           |             |          |            |
|---------------------------|-------------|----------|------------|--------------|-------------|----------|------------|
|                           | Theoretical | Observed | Difference |              | Theoretical | Observed | Difference |
| No free thiols            | 6367.3      |          |            | No free thic | 6367.3      |          |            |
| 1 free thiol (plus 58 Da) | 6425.3      |          |            | 1 free thiol | 6425.3      |          |            |
| 2 free thiol              | 6483.3      |          |            | 2 free thiol | 6483.3      |          |            |
| 3 free thiol              | 6541.3      |          |            | 3 free thiol | 6541.3      |          |            |
| 4 free thiol              | 6599.3      | 6609     | -9.7       | 4 free thiol | 6599.3      |          |            |
| 5 free thiol              | 6657.3      | 6672.8   | -15.5      | 5 free thiol | 6657.3      |          |            |
| 6 free thiol              | 6715.3      | 6721.6   | -6.3       | 6 free thiol | 6715.3      |          |            |
| 7 free thiol              | 6773.3      | 6774.3   | -1         | 7 free thiol | 6773.3      |          |            |
| 8 free thiol              | 6831.3      | 6836     | -4.7       | 8 free thiol | 6831.3      | 6843.5   | -12.2      |
| 9 free thiol              | 6889.3      | 6889.8   | -0.5       | 9 free thiol | 6889.3      | 6892.1   | -2.8       |
| 10 free thiol             | 6947.3      | 6939     | 8.3        | 10 free thic | 6947.3      | 6959.2   | -11.9      |
| 11 free thiol             | 7005.3      |          |            | 11 free thic | 7005.3      | 7011.2   | -5.9       |
| 12 free thiol             | 7063.3      |          |            | 12 free thic | 7063.3      | 7057.8   | 5.5        |
|                           |             |          |            |              |             | 7113.89  |            |

| Mn                        |             |          |            | Ni           |             |          |            |
|---------------------------|-------------|----------|------------|--------------|-------------|----------|------------|
|                           | Theoretical | Observed | Difference |              | Theoretical | Observed | Difference |
|                           |             | 5962.3   |            |              |             | 5963.6   |            |
| No free thiols            | 6017.7      | 6010.2   | 7.5        | No free thic | 6017.7      | 6010     | 7.7        |
| 1 free thiol (plus 58 Da) | 6075.7      | 6066.2   | 9.5        | 1 free thiol | 6075.7      | 6065.6   | 10.1       |
| 2 free thiol              | 6133.7      | 6125.8   | 7.9        | 2 free thiol | 6133.7      | 6126.9   | 6.8        |
| 3 free thiol              | 6191.7      | 6187.9   | 3.8        | 3 free thiol | 6191.7      | 6196.4   | -4.7       |
| 4 free thiol              | 6249.7      | 6241.5   | 8.2        | 4 free thiol | 6249.7      | 6255.7   | -6         |
| 5 free thiol              | 6307.7      | 6308.8   | -1.1       | 5 free thiol | 6307.7      | 6312.7   | -5         |
| 6 free thiol              | 6365.7      | 6366.8   | -1.1       | 6 free thiol | 6365.7      | 6373.3   | -7.6       |
| 7 free thiol              | 6423.7      | 6424.7   | -1         | 7 free thiol | 6423.7      | 6429.2   | -5.5       |
| 8 free thiol              | 6481.7      | 6483.4   | -1.7       | 8 free thiol | 6481.7      | 6476.4   | 5.3        |
| 9 free thiol              | 6539.7      | 6541.1   | -1.4       | 9 free thiol | 6539.7      | 6532.5   | 7.2        |
| 10 free thiol             | 6597.7      | 6590.1   | 7.6        | 10 free thic | 6597.7      | 6592.5   | 5.2        |
| 11 free thiol             | 6655.7      | 6648.1   | 7.6        | 11 free thic | 6655.7      | 6638.8   | 16.9       |
| 12 free thiol             | 6713.7      | 6706.9   | 6.8        | 12 free thic | 6713.7      | 6702.7   | 11         |

| <b>Zn</b>    |          |            | <b>Cd</b>    |              |            |        |      |
|--------------|----------|------------|--------------|--------------|------------|--------|------|
| Theoretical  | Observed | Difference | Theoretical  | Observed     | Difference |        |      |
| No free thic | 6367.3   |            | No free thic | 6367.3       | 6354.9     | 12.4   |      |
| 1 free thiol | 6425.3   |            | 1 free thiol | 6425.3       |            |        |      |
| 2 free thiol | 6483.3   | 6474.1     | 9.2          | 2 free thiol | 6483.3     |        |      |
| 3 free thiol | 6541.3   | 6521.6     | 19.7         | 3 free thiol | 6541.3     |        |      |
| 4 free thiol | 6599.3   | 6569.9     | 29.4         | 4 free thiol | 6599.3     |        |      |
| 5 free thiol | 6657.3   | 6688.5     | -31.2        | 5 free thiol | 6657.3     |        |      |
| 6 free thiol | 6715.3   | 6738.1     | -22.8        | 6 free thiol | 6715.3     |        |      |
| 7 free thiol | 6773.3   | 6785.3     | -12          | 7 free thiol | 6773.3     |        |      |
| 8 free thiol | 6831.3   | 6840.3     | -9           | 8 free thiol | 6831.3     | 6839.1 | -7.8 |
| 9 free thiol | 6889.3   | 6896.3     | -7           | 9 free thiol | 6889.3     | 6888.3 | 1    |
| 10 free thic | 6947.3   | 6964.7     | -17.4        | 10 free thic | 6947.3     | 6935.9 | 11.4 |
| 11 free thic | 7005.3   | 7013.7     | -8.4         | 11 free thic | 7005.3     | 6999.1 | 6.2  |
| 12 free thic | 7063.3   | 7062.5     | 0.8          | 12 free thic | 7063.3     | 7051.8 | 11.5 |
|              |          | 7111.1     |              |              |            | 7094.2 |      |

| <b>Zn</b>    |          |            | <b>Cd</b>   |              |            |        |      |
|--------------|----------|------------|-------------|--------------|------------|--------|------|
| Theoretical  | Observed | Difference | Theoretical | Observed     | Difference |        |      |
|              | 5961.6   |            |             | 5962.6       |            |        |      |
| No free thic | 6017.7   | 6009.8     | 7.9         | No free thic | 6017.7     | 6009.4 | 8.3  |
| 1 free thiol | 6075.7   | 6067.3     | 8.4         | 1 free thiol | 6075.7     |        |      |
| 2 free thiol | 6133.7   | 6126.4     | 7.3         | 2 free thiol | 6133.7     |        |      |
| 3 free thiol | 6191.7   | 6188.2     | 3.5         | 3 free thiol | 6191.7     |        |      |
| 4 free thiol | 6249.7   | 6240.9     | 8.8         | 4 free thiol | 6249.7     | 6240.9 | 8.8  |
| 5 free thiol | 6307.7   |            | 6307.7      | 5 free thiol | 6307.7     |        |      |
| 6 free thiol | 6365.7   | 6375.3     | -9.6        | 6 free thiol | 6365.7     |        |      |
| 7 free thiol | 6423.7   | 6431.8     | -8.1        | 7 free thiol | 6423.7     |        |      |
| 8 free thiol | 6481.7   | 6490.4     | -8.7        | 8 free thiol | 6481.7     | 6479   | 2.7  |
| 9 free thiol | 6539.7   | 6543.5     | -3.8        | 9 free thiol | 6539.7     | 6541.1 | -1.4 |
| 10 free thic | 6597.7   | 6601.3     | -3.6        | 10 free thic | 6597.7     | 6589.9 | 7.8  |
| 11 free thic | 6655.7   | 6660.1     | -4.4        | 11 free thic | 6655.7     | 6651.5 | 4.2  |
| 12 free thic | 6713.7   | 6709.3     | 4.4         | 12 free thic | 6713.7     | 6705.5 | 8.2  |
|              |          |            |             |              |            | 6750.2 |      |

## GRN-3 IAS pH 4.5

| Ctrl         |             |          |            | Ca           |             |          |            | Co           |
|--------------|-------------|----------|------------|--------------|-------------|----------|------------|--------------|
|              | Theoretical | Observed | Difference |              | Theoretical | Observed | Difference |              |
| No free thic | 6367.3      |          |            | No free thic | 6367.3      |          |            | No free thic |
| 1 free thiol | 6425.3      |          |            | 1 free thiol | 6425.3      |          |            | 1 free thiol |
| 2 free thiol | 6483.3      | 6496.1   | -12.8      | 2 free thiol | 6483.3      | 6499.4   | -16.1      | 2 free thiol |
| 3 free thiol | 6541.3      | 6547.7   | -6.4       | 3 free thiol | 6541.3      | 6551.5   | -10.2      | 3 free thiol |
| 4 free thiol | 6599.3      | 6601.6   | -2.3       | 4 free thiol | 6599.3      | 6604     | -4.7       | 4 free thiol |
| 5 free thiol | 6657.3      | 6657.5   | -0.2       | 5 free thiol | 6657.3      | 6659.7   | -2.4       | 5 free thiol |
| 6 free thiol | 6715.3      | 6714.9   | 0.4        | 6 free thiol | 6715.3      | 6716.6   | -1.3       | 6 free thiol |
| 7 free thiol | 6773.3      | 6772.9   | 0.4        | 7 free thiol | 6773.3      | 6774.1   | -0.8       | 7 free thiol |
| 8 free thiol | 6831.3      | 6830.1   | 1.2        | 8 free thiol | 6831.3      | 6831.4   | -0.1       | 8 free thiol |
| 9 free thiol | 6889.3      | 6886.1   | 3.2        | 9 free thiol | 6889.3      | 6888.2   | 1.1        | 9 free thiol |
| 10 free thic | 6947.3      | 6923.5   | 23.8       | 10 free thic | 6947.3      | 6941.9   | 5.4        | 10 free thic |
| 11 free thic | 7005.3      |          |            | 11 free thic | 7005.3      |          |            | 11 free thic |
| 12 free thic | 7063.3      |          |            | 12 free thic | 7063.3      |          |            | 12 free thic |

## GRN-5 IAS pH 4.5

| Ctrl         |             |          |            | Ca           |             |          |            | Co           |
|--------------|-------------|----------|------------|--------------|-------------|----------|------------|--------------|
|              | Theoretical | Observed | Difference |              | Theoretical | Observed | Difference |              |
|              |             | 5965.4   |            |              |             | 5964     |            |              |
| No free thic | 6017.7      | 6012.8   | 4.9        | No free thic | 6017.7      | 6012.8   | 4.9        | No free thic |
| 1 free thiol | 6075.7      | 6076     | -0.3       | 1 free thiol | 6075.7      | 6076.6   | -0.9       | 1 free thiol |
| 2 free thiol | 6133.7      | 6135.4   | -1.7       | 2 free thiol | 6133.7      | 6149.7   | -16        | 2 free thiol |
| 3 free thiol | 6191.7      | 6192.7   | -1         | 3 free thiol | 6191.7      | 6195.1   | -3.4       | 3 free thiol |
| 4 free thiol | 6249.7      | 6250.7   | -1         | 4 free thiol | 6249.7      | 6252.6   | -2.9       | 4 free thiol |
| 5 free thiol | 6307.7      | 6308.6   | -0.9       | 5 free thiol | 6307.7      | 6310.5   | -2.8       | 5 free thiol |
| 6 free thiol | 6365.7      | 6364.9   | 0.8        | 6 free thiol | 6365.7      | 6368.1   | -2.4       | 6 free thiol |
| 7 free thiol | 6423.7      |          |            | 7 free thiol | 6423.7      | 6423.8   | -0.1       | 7 free thiol |
| 8 free thiol | 6481.7      |          |            | 8 free thiol | 6481.7      |          |            | 8 free thiol |
| 9 free thiol | 6539.7      |          |            | 9 free thiol | 6539.7      |          |            | 9 free thiol |
| 10 free thic | 6597.7      |          |            | 10 free thic | 6597.7      |          |            | 10 free thic |
| 11 free thic | 6655.7      |          |            | 11 free thic | 6655.7      |          |            | 11 free thic |
| 12 free thic | 6713.7      |          |            | 12 free thic | 6713.7      |          |            | 12 free thic |

| Theoretical | Observed | Difference | <b>Cu</b>    | Theoretical | Observed | Difference | <b>Mg</b>    | Theoretical |
|-------------|----------|------------|--------------|-------------|----------|------------|--------------|-------------|
| 6367.3      |          |            | No free thic | 6367.3      | 6364.4   | 2.9        | No free thic | 6367.3      |
| 6425.3      |          |            | 1 free thiol | 6425.3      | 6426.1   | -0.8       | 1 free thiol | 6425.3      |
| 6483.3      | 6498.5   | -15.2      | 2 free thiol | 6483.3      |          |            | 2 free thiol | 6483.3      |
| 6541.3      | 6553.5   | -12.2      | 3 free thiol | 6541.3      |          |            | 3 free thiol | 6541.3      |
| 6599.3      | 6609     | -9.7       | 4 free thiol | 6599.3      |          |            | 4 free thiol | 6599.3      |
| 6657.3      | 6662     | -4.7       | 5 free thiol | 6657.3      |          |            | 5 free thiol | 6657.3      |
| 6715.3      | 6717.5   | -2.2       | 6 free thiol | 6715.3      |          |            | 6 free thiol | 6715.3      |
| 6773.3      | 6773     | 0.3        | 7 free thiol | 6773.3      |          |            | 7 free thiol | 6773.3      |
| 6831.3      | 6830     | 1.3        | 8 free thiol | 6831.3      |          |            | 8 free thiol | 6831.3      |
| 6889.3      | 6886.8   | 2.5        | 9 free thiol | 6889.3      |          |            | 9 free thiol | 6889.3      |
| 6947.3      | 6942.9   | 4.4        | 10 free thic | 6947.3      |          |            | 10 free thic | 6947.3      |
| 7005.3      | 6995.8   | 9.5        | 11 free thic | 7005.3      |          |            | 11 free thic | 7005.3      |
| 7063.3      | 7050.9   | 12.4       | 12 free thic | 7063.3      |          |            | 12 free thic | 7063.3      |

| Theoretical | Observed | Difference | <b>Cu</b>    | Theoretical | Observed | Difference | <b>Mg</b>    | Theoretical |
|-------------|----------|------------|--------------|-------------|----------|------------|--------------|-------------|
|             | 5966.8   |            |              |             | 5965.8   |            |              |             |
| 6017.7      | 6014.1   | 3.6        | No free thic | 6017.7      | 6014.9   | 2.8        | No free thic | 6017.7      |
| 6075.7      | 6073.8   | 1.9        | 1 free thiol | 6075.7      | 6061     | 14.7       | 1 free thiol | 6075.7      |
| 6133.7      | 6146     | -12.3      | 2 free thiol | 6133.7      | 6133.5   | 0.2        | 2 free thiol | 6133.7      |
| 6191.7      | 6192.3   | -0.6       | 3 free thiol | 6191.7      |          |            | 3 free thiol | 6191.7      |
| 6249.7      | 6249.3   | 0.4        | 4 free thiol | 6249.7      |          |            | 4 free thiol | 6249.7      |
| 6307.7      | 6306.2   | 1.5        | 5 free thiol | 6307.7      |          |            | 5 free thiol | 6307.7      |
| 6365.7      | 6363.6   | 2.1        | 6 free thiol | 6365.7      |          |            | 6 free thiol | 6365.7      |
| 6423.7      | 6418.9   | 4.8        | 7 free thiol | 6423.7      |          |            | 7 free thiol | 6423.7      |
| 6481.7      |          |            | 8 free thiol | 6481.7      |          |            | 8 free thiol | 6481.7      |
| 6539.7      |          |            | 9 free thiol | 6539.7      |          |            | 9 free thiol | 6539.7      |
| 6597.7      |          |            | 10 free thic | 6597.7      |          |            | 10 free thic | 6597.7      |
| 6655.7      |          |            | 11 free thic | 6655.7      |          |            | 11 free thic | 6655.7      |
| 6713.7      |          |            | 12 free thic | 6713.7      |          |            | 12 free thic | 6713.7      |

| Observed | Difference | Mn           | Theoretical | Observed | Difference | Ni           | Theoretical | Observed |
|----------|------------|--------------|-------------|----------|------------|--------------|-------------|----------|
|          |            | No free thic | 6367.3      |          |            | No free thic | 6367.3      |          |
|          |            | 1 free thiol | 6425.3      |          |            | 1 free thiol | 6425.3      |          |
| 6495.7   | -12.4      | 2 free thiol | 6483.3      | 6494     | -10.7      | 2 free thiol | 6483.3      | 6489.9   |
| 6552.1   | -10.8      | 3 free thiol | 6541.3      | 6549.5   | -8.2       | 3 free thiol | 6541.3      | 6548.5   |
| 6606.8   | -7.5       | 4 free thiol | 6599.3      | 6605.1   | -5.8       | 4 free thiol | 6599.3      | 6603.3   |
| 6658.9   | -1.6       | 5 free thiol | 6657.3      | 6658.3   | -1         | 5 free thiol | 6657.3      | 6658     |
| 6713.5   | 1.8        | 6 free thiol | 6715.3      | 6713.5   | 1.8        | 6 free thiol | 6715.3      | 6712.7   |
| 6770.1   | 3.2        | 7 free thiol | 6773.3      | 6769.3   | 4          | 7 free thiol | 6773.3      | 6767.9   |
| 6827.7   | 3.6        | 8 free thiol | 6831.3      | 6826.5   | 4.8        | 8 free thiol | 6831.3      | 6825.5   |
| 6885.4   | 3.9        | 9 free thiol | 6889.3      | 6884.3   | 5          | 9 free thiol | 6889.3      | 6884.1   |
| 6942.6   | 4.7        | 10 free thic | 6947.3      | 6941.6   | 5.7        | 10 free thic | 6947.3      | 6941.3   |
| 6998.3   | 7          | 11 free thic | 7005.3      | 6996.4   | 8.9        | 11 free thic | 7005.3      | 6987.5   |
| 7036.7   | 26.6       | 12 free thic | 7063.3      | 7034.8   | 28.5       | 12 free thic | 7063.3      | 7035     |

| Observed | Difference | Mn           | Theoretical | Observed | Difference | Ni           | Theoretical | Observed |
|----------|------------|--------------|-------------|----------|------------|--------------|-------------|----------|
| 5967.6   |            |              |             | 5964.4   |            |              |             | 5966.2   |
| 6016.2   | 1.5        | No free thic | 6017.7      | 6012.7   | 5          | No free thic | 6017.7      | 6013.8   |
| 6077.2   | -1.5       | 1 free thiol | 6075.7      | 6072.6   | 3.1        | 1 free thiol | 6075.7      | 6073.5   |
| 6150.7   | -17        | 2 free thiol | 6133.7      | 6134.8   | -1.1       | 2 free thiol | 6133.7      | 6133.2   |
| 6197.8   | -6.1       | 3 free thiol | 6191.7      | 6192.7   | -1         | 3 free thiol | 6191.7      | 6191.7   |
| 6254.4   | -4.7       | 4 free thiol | 6249.7      | 6250.1   | -0.4       | 4 free thiol | 6249.7      | 6249.1   |
| 6311.4   | -3.7       | 5 free thiol | 6307.7      | 6307.5   | 0.2        | 5 free thiol | 6307.7      | 6307     |
| 6368.9   | -3.2       | 6 free thiol | 6365.7      | 6365.3   | 0.4        | 6 free thiol | 6365.7      | 6364.7   |
| 6425.3   | -1.6       | 7 free thiol | 6423.7      | 6422.5   | 1.2        | 7 free thiol | 6423.7      | 6423     |
|          |            | 8 free thiol | 6481.7      |          |            | 8 free thiol | 6481.7      |          |
|          |            | 9 free thiol | 6539.7      |          |            | 9 free thiol | 6539.7      |          |
|          |            | 10 free thic | 6597.7      |          |            | 10 free thic | 6597.7      |          |
|          |            | 11 free thic | 6655.7      |          |            | 11 free thic | 6655.7      |          |
|          |            | 12 free thic | 6713.7      |          |            | 12 free thic | 6713.7      |          |





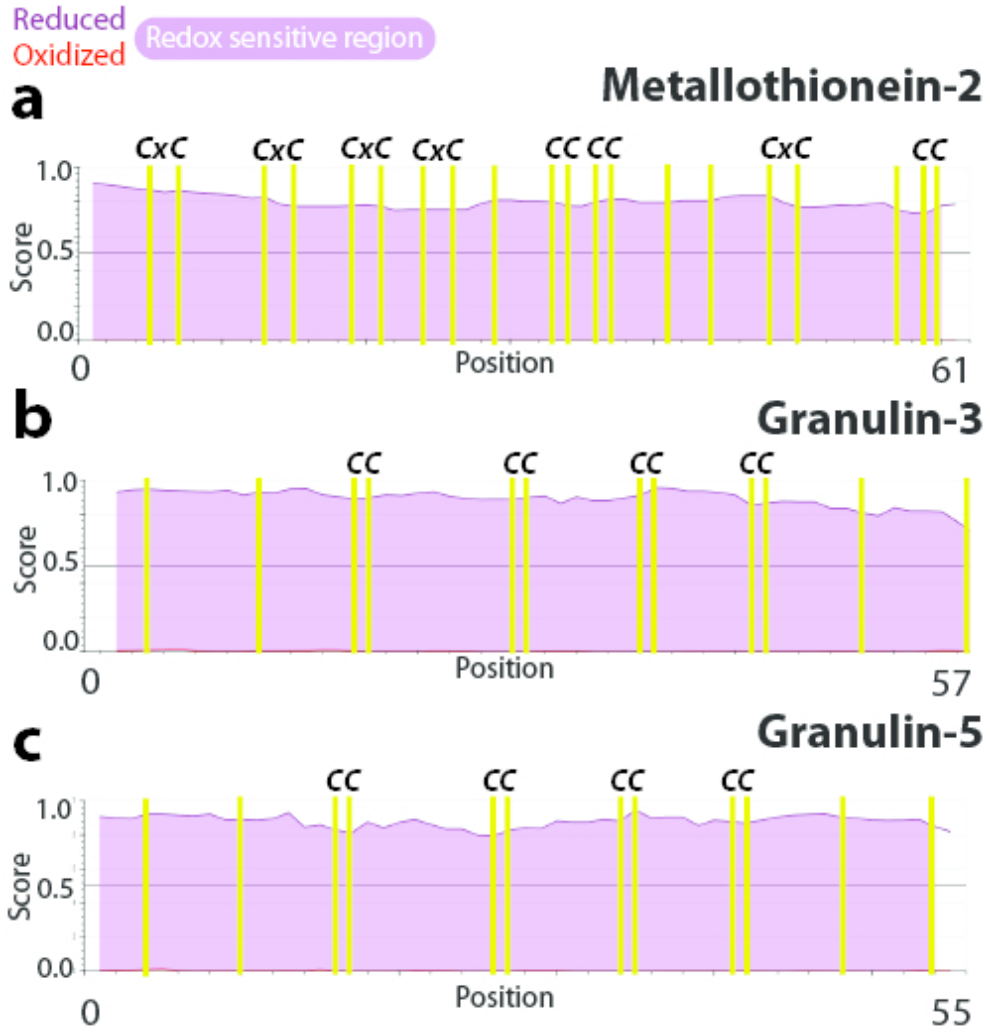

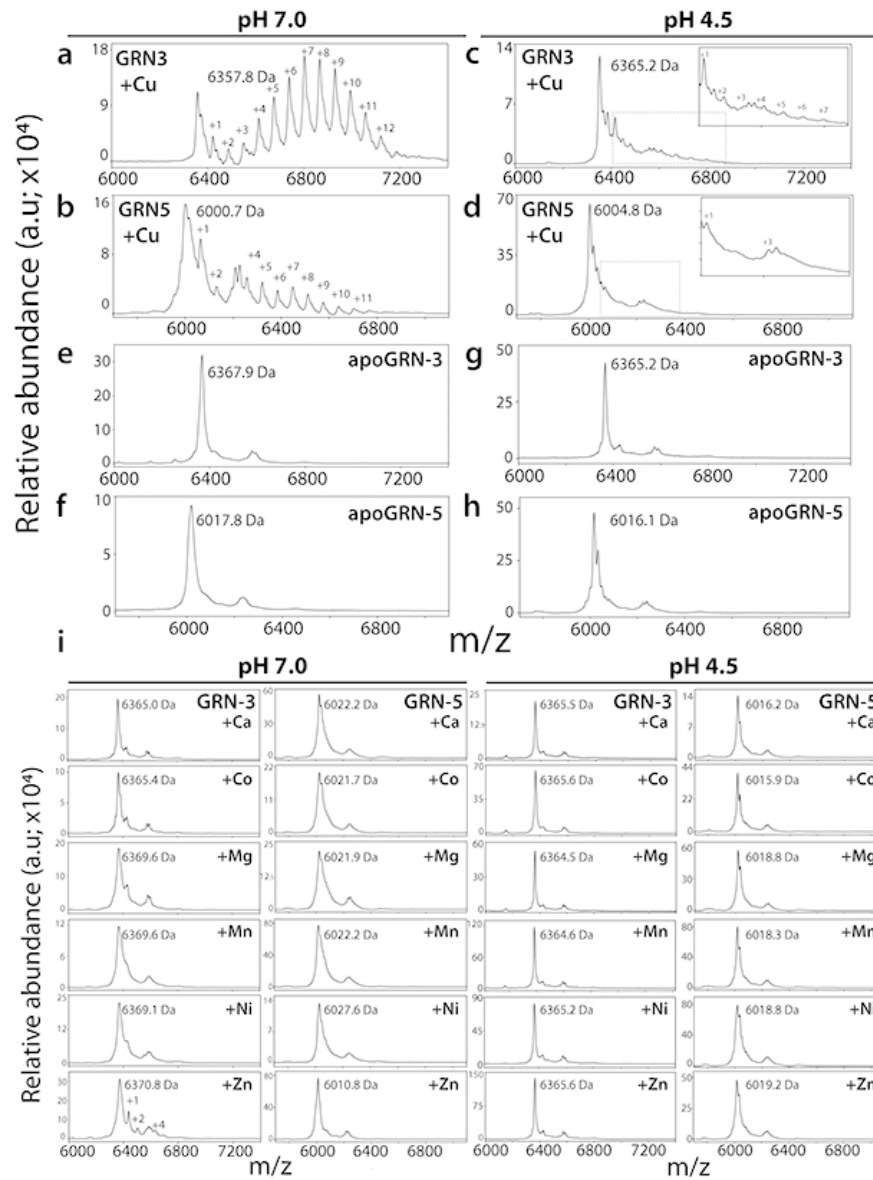

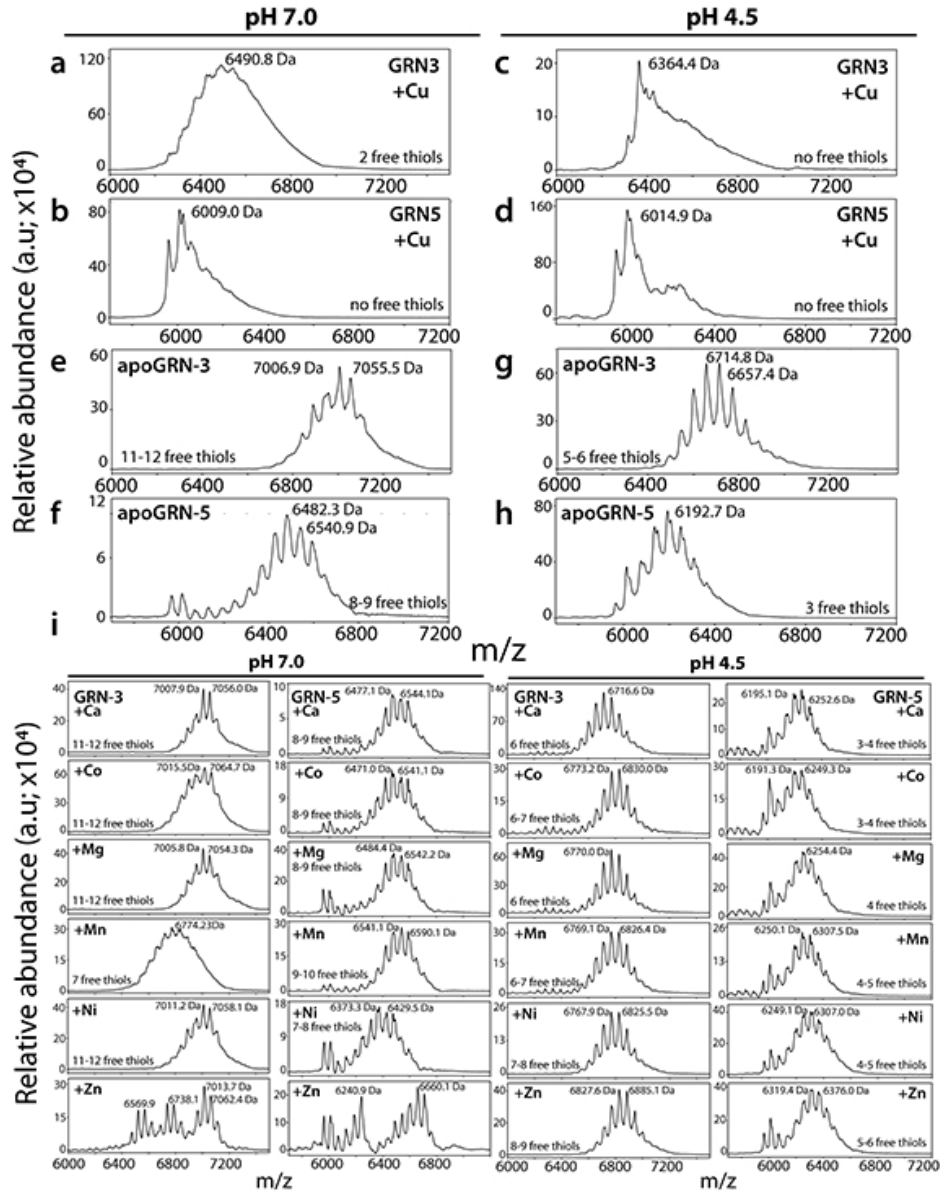

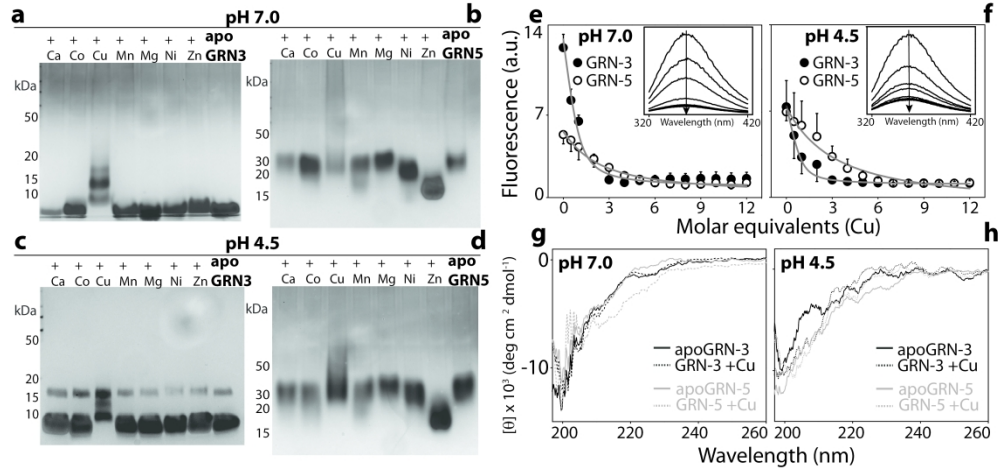

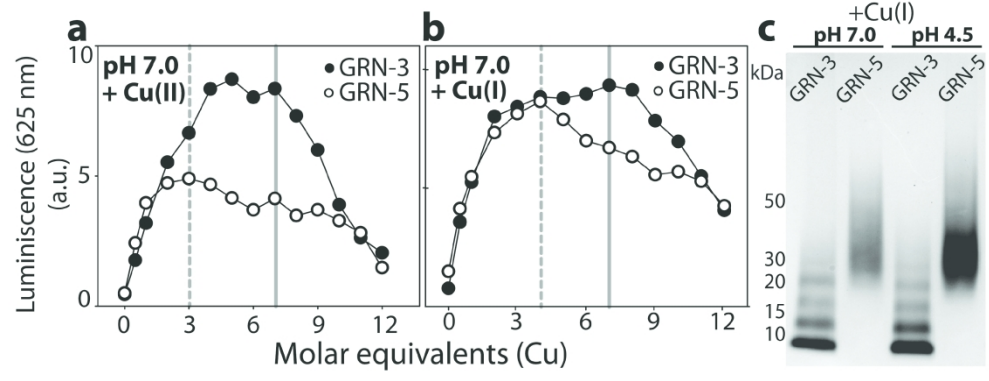

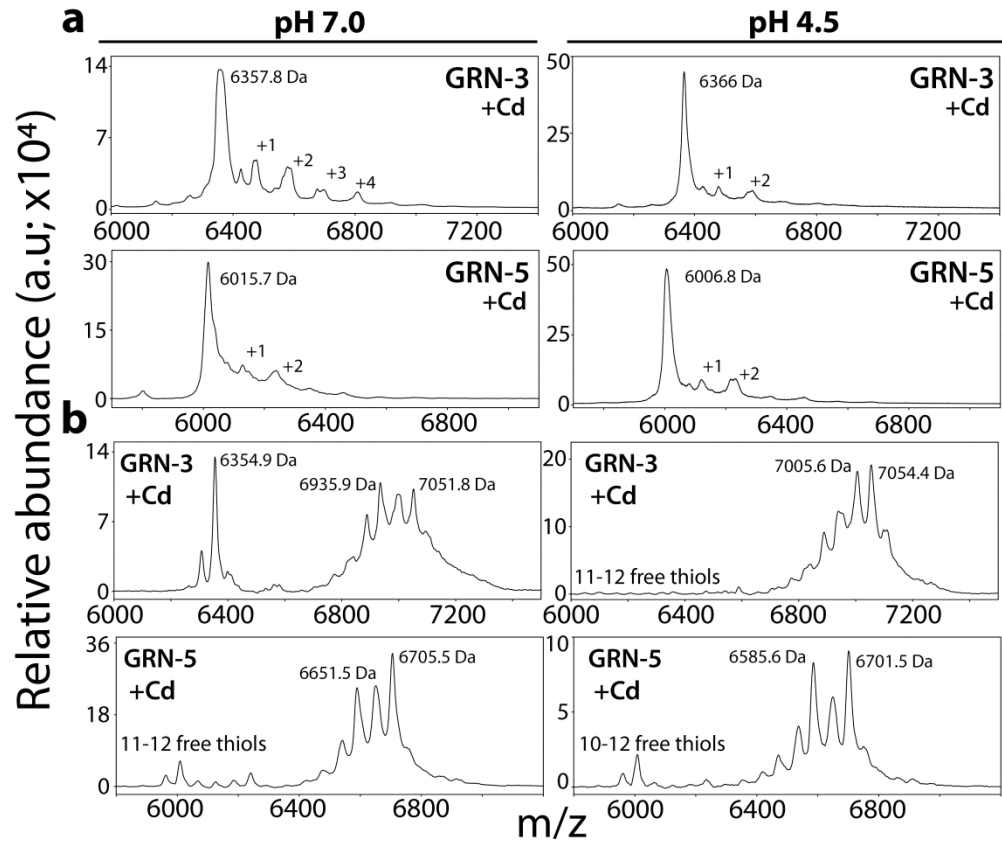

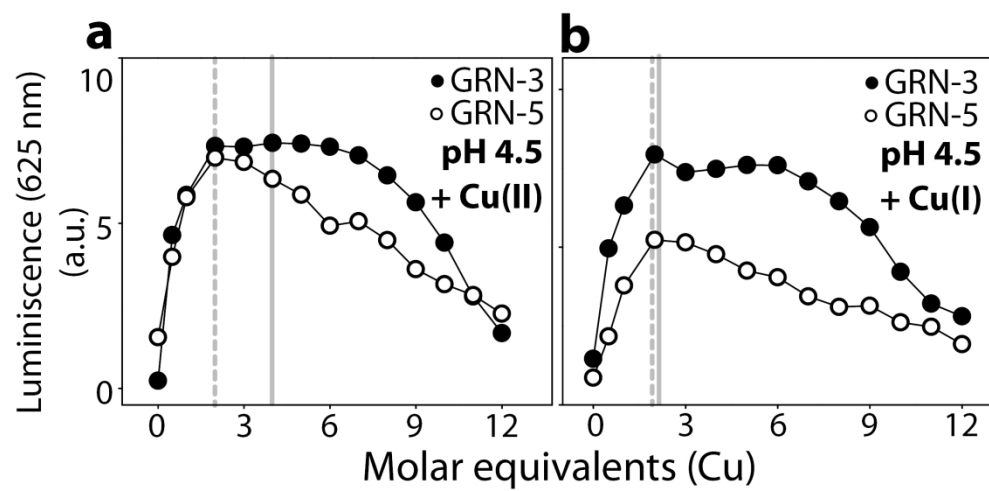

Supplement: NIHMS1650399-supplement-1.pdf [file NIHMS1650399-supplement-1.pdf]
